# Supplementary material
Source: Springer Nature journal article supplement (https://www.springermedizin.de/resource/supplementary/12955_2010_678_MOESM2_ESM.pdf/9561066)

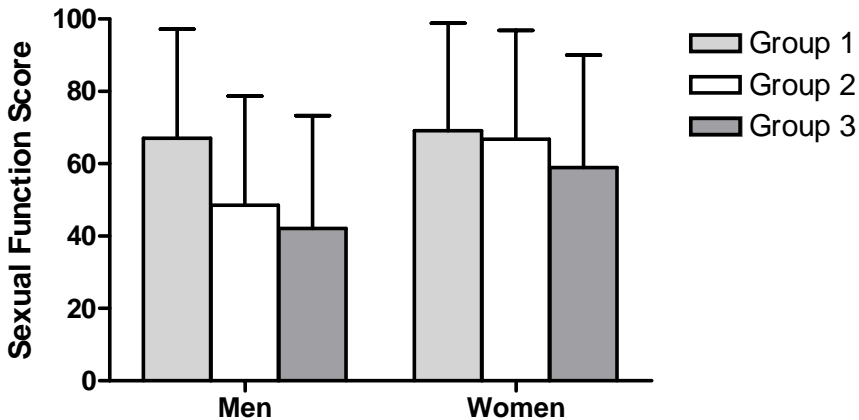

Supplement: MOESM2 [file 9561066]
